# Supplementary material for: Parental histone deposition on the replicated strands promotes error-free DNA damage tolerance and regulates drug resistance
Source: PubMed Central journal article supplement — Genes Dev. 2022 Feb 1;36(3-4):167–79. doi: 10.1101/gad.349207.121 (PMC8887126; doi:10.1101/gad.349207.121), 2022-02-01
Supplement: supp_gad.349207.121_Supplemental_Data.pdf [file supp_gad.349207.121_Supplemental_Data.pdf]

## **Supplementary Information**

### **Parental histone deposition on the replicated strands promotes error-free DNA damage tolerance and regulates drug resistance**

Valeria Dolce<sup>1</sup>, Sabrina Dusi<sup>1</sup>, Michele Giannattasio<sup>1,2</sup>, Chinnu Rose Joseph<sup>1</sup>, Marco Fumasoni<sup>1,3</sup> and Dana Branzei<sup>1,4,\*</sup>

<sup>1</sup>IFOM, the FIRC (Fondazione Italiana per la Ricerca sul Cancro) Institute of Molecular Oncology, Via Adamello 16, 20139 Milan, Italy

<sup>2</sup>Dipartimento di Oncologia & Emato-Oncologia, Università degli Studi di Milano, via Festa del Perdono 7, 20122 Milano, Italy

<sup>3</sup>Present address: Instituto Gulbenkian de Ciência (IGC), Rua da Quinta Grande, 6, 2780-156 Oeiras, Portugal

<sup>4</sup>Istituto di Genetica Molecolare, Consiglio Nazionale delle Ricerche (IGM-CNR), 27100 Pavia, Italy

\* Corresponding author

E-mail: [dana.branzei@ifom.eu](mailto:dana.branzei@ifom.eu)

**Table S1. *Saccharomyces cerevisiae* strains used in this study.**

| Strain  | Relevant Genotype                                                                                                      | Reference      |
|---------|------------------------------------------------------------------------------------------------------------------------|----------------|
| FY1296  | Mat a, ade2-1 trp1-1 leu2-3,112 his3-11,15 ura3 can1-100, Rad5+ (W303)                                                 | Lab collection |
| HY8755  | W303 Mat a, ctf4delta::NAT                                                                                             | Lab collection |
| HY3373  | W303 Mat a, dpb3delta::hphMX4                                                                                          | Lab collection |
| HY9391  | W303 Mat a, dpb3delta::hphMX4, ctf4delta::NAT                                                                          | This study     |
| HY7220  | W303 Mat a, dpb4delta::NAT                                                                                             | This study     |
| HY7223  | W303 Mat a, ctf4delta::TRP, dpb4delta::NAT                                                                             | This study     |
| HY7222  | W303 Mat a, dpb3delta::hphMX4, dpb4delta::NAT                                                                          | This study     |
| HY7224  | W303 Mat a, ctf4delta::TRP, dpb3delta::hphMX4, dpb4delta::NAT                                                          | This study     |
| HY1788  | W303 Mat a, his3-11,15::HIS3tetR-GFP (single integrant), ura3::3XURA3tetO112, omns                                     | Lab collection |
| HY1854  | W303 Mat a, his3-11,15::HIS3tetR-GFP (single integrant), ura3::3XURA3tetO112, omns, ctf4delta::TRP1                    | Lab collection |
| HY3927  | W303 Mat a, his3-11,15::HIS3tetR-GFP (single integrant), ura3::3XURA3tetO112, omns, dpb3delta::hphMX4, ctf4delta::TRP1 | Lab collection |
| HY3924  | W303 Mat a, his3-11,15::HIS3tetR-GFP (single integrant), ura3::3XURA3tetO112, omns, dpb3delta::hphMX4                  | Lab collection |
| HY7607  | W303 Mat a, dls1delta::KanMX                                                                                           | This study     |
| HY7608  | W303 Mat a, dls1delta::KanMX, dpb3delta::hphMX4                                                                        | This study     |
| HY11147 | W303 Mat alpha, ctf4delta::NAT, dls1delta::KanMX, dpb3delta::hphMX4                                                    | This study     |
| HY7695  | W303 Mat a, ctf4delta::TRP, dls1delta::KanMX                                                                           | This study     |
| HY9374  | W303 Mat a, Dpb3(K16A, K18D, K19A, K62A, K64A)-6xHIS-3FLAG::KANMX4                                                     | This study     |
| HY10454 | W303 Mat a, ctf4delta::NAT, Dpb3(K16A, K18D, K19A, K62A, K64A)-6xHIS-3FLAG::KANMX4                                     | This study     |
| HY2194  | W303 Mat a, ctf4delta::TRP                                                                                             | Lab collection |
| HY7259  | W303 Mat a, ctf4delta::TRP dpb3delta::hphMX4                                                                           | Lab collection |
| HY4020  | W303 Mat a, sgs1::pADH1-tc3-3xHA-Sgs1 (HPHMX4)                                                                         | Lab collection |
| HY10415 | W303 Mat a, sgs1::pADH1-tc3-3xHA-Sgs1 (KanMX), ctf4delta::NAT                                                          | This study     |

|         |                                                                                                       |                |
|---------|-------------------------------------------------------------------------------------------------------|----------------|
| HY4213  | W303 Mat a, sgs1::pADH1-tc3-3xHA-Sgs1 (NATMX), dpb3delta::hphMX4                                      | Lab collection |
| HY11041 | W303 Mat a, sgs1::pADH1-tc3-3xHA-Sgs1 (NATMX), dpb3delta::hphMX4, ctf4delta::KANMX                    | This study     |
| HY11623 | W303 Mat a, rev3delta:LEU2                                                                            | This study     |
| HY11715 | W303 Mat a, ctf4delta::NAT, dpb3delta::hphMX4, rev3delta:LEU2                                         | This study     |
| HY11721 | W303 Mat a, ctf4delta::NAT, Dpb3(K16A, K18D, K19A, K62A, K64A)-6xHIS-3FLAG::KANMX4, rev3delta:LEU2    | This study     |
| HY11055 | W303 Mat a, rev1delta::KanMX4                                                                         | This study     |
| HY11073 | W303 Mat a, ctf4delta::NAT, dpb3delta::hphMX4 rev1delta::KanMX4                                       | This study     |
| HY11366 | W303 Mat a, ctf4delta::NAT, Dpb3(K16A, K18D, K19A, K62A, K64A)-6xHIS-3FLAG::KANMX4, rev1delta::KANMX4 | This study     |
| HY6848  | W303 Mat a, sgs1delta::HIS3                                                                           | Lab collection |
| HY3829  | W303 Mat a, sgs1::AUR1, dpb3delta::hphMX4,                                                            | Lab collection |
| HY12065 | W303 Mat a, sgs1::HIS3, dpb3delta::hphMX4,                                                            | Lab collection |
| HY11375 | W303 Mat a, sgs1::HIS3, Dpb3(K16A, K18D, K19A, K62A, K64A)-6xHIS-3FLAG::KANMX4                        | This study     |
| HY11468 | W303 Mat a, pol1-2A2, sgs1::HIS3                                                                      | This study     |
| HY11425 | W303 Mat a, mcm2-3A::hphNT, sgs1delta::HIS3                                                           | This study     |
| HY11466 | W303 Mat a, pol1-2A2, sgs1::pADH1-tc3-3xHA-Sgs1 (HPHMX4)                                              | This study     |
| HY11470 | W303 Mat a, mcm2-3A::hphNT, sgs1::pADH1-tc3-3xHA-Sgs1 (NATMX)                                         | This study     |
| HY8323  | W303 Mat a, ctf4-4E                                                                                   | K. Labib lab   |
| HY7667  | W303 Mat a, dpb3delta::hphMX4, ctf4-4E                                                                | This study     |
| HY7902  | W303 Mat a, ctf4-3E                                                                                   | K. Labib lab   |
| HY7669  | W303 Mat a, dpb3delta::hphMX4, ctf4-3E                                                                | This study     |
| HY4160  | W303 Mat a, mms22delta::HIS                                                                           | This study     |
| HY12186 | W303 Mat a, ctf4delta::NAT, mms22delta::KAN                                                           | This study     |
| HY12187 | W303 Mat a, dpb3delta::hphMX4, mms22delta::KAN                                                        | This study     |
| HY12188 | W303 Mat a, dpb3delta::hphMX4, ctf4delta::NAT, mms22delta::KAN                                        | This study     |

|         |                                                                                                         |                |
|---------|---------------------------------------------------------------------------------------------------------|----------------|
| HY12306 | W303 Mat a, mcm2-3A::hphMX4                                                                             | Z. Zhang lab   |
| HY11374 | W303 Mat a, pol1-2A2                                                                                    | Z. Zhang lab   |
| HY11799 | W303 Mat a, mcm2-3A::hphMX4, rev3delta::LEU2                                                            | This study     |
| HY9730  | W303 Mat a, ctf4(460-927)-3FLAG(KANMX4)                                                                 | This study     |
| HY12411 | W303 Mat a, ctf4(460-927)-3FLAG(KANMX), dpb3delta::hphMX4                                               | This study     |
| HY12412 | W303 Mat alpha, ctf4delta::NAT, mcm2-3A:: hphMX4                                                        | This study     |
| HY12413 | W303 Mat alpha, ctf4delta::NAT, pol1-2A2                                                                | This study     |
| FY0001  | Mat alpha ade2-101 leu2-3,112 lys2-801 ura3-52 his3-delta200 (PY83)                                     | Lab collection |
| HY3466  | PY83 Mat alpha, ctf4delta::hphMX4                                                                       | Lab collection |
| HY8684  | PY83 Mat alpha, dpb3delta::NAT                                                                          | This study     |
| HY8683  | PY83 Mat alpha, ctf4delta::hphMX4, dpb3delta::NAT                                                       | This study     |
| HY8909  | PY83 Mat alpha, ctf4delta::HPH, dpb3delta::NAT, rev3delta::KANMX                                        | This study     |
| FY2040  | Mat alpha, can1delta::STE2pr-Sp_his5, lyp1delta, his3delta1, leu2delta0, ura3delta0, met15delta0, LYS2+ | M.Foiani lab   |

## Supplementary figures

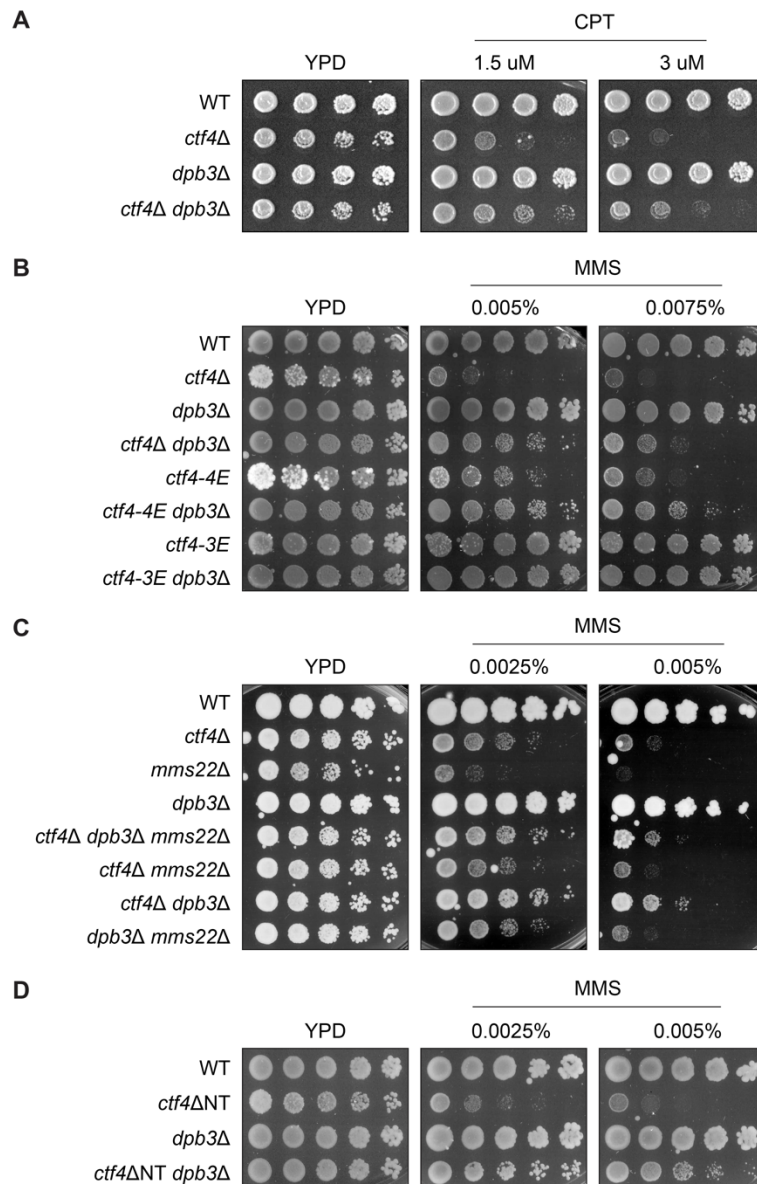

**Figure S1. Ctf4 and Mms22 roles in the context of the replisome are being affected by Dpb3**

(A-D) CPT and MMS sensitivity assay of cells with the indicated genotypes. Cells were grown overnight at 28°C, serially diluted and spotted on the indicated CPT and MMS concentration to test their sensitivity to the drug. Images were taken after 3 days of incubation at 28°C in two independent experiments.

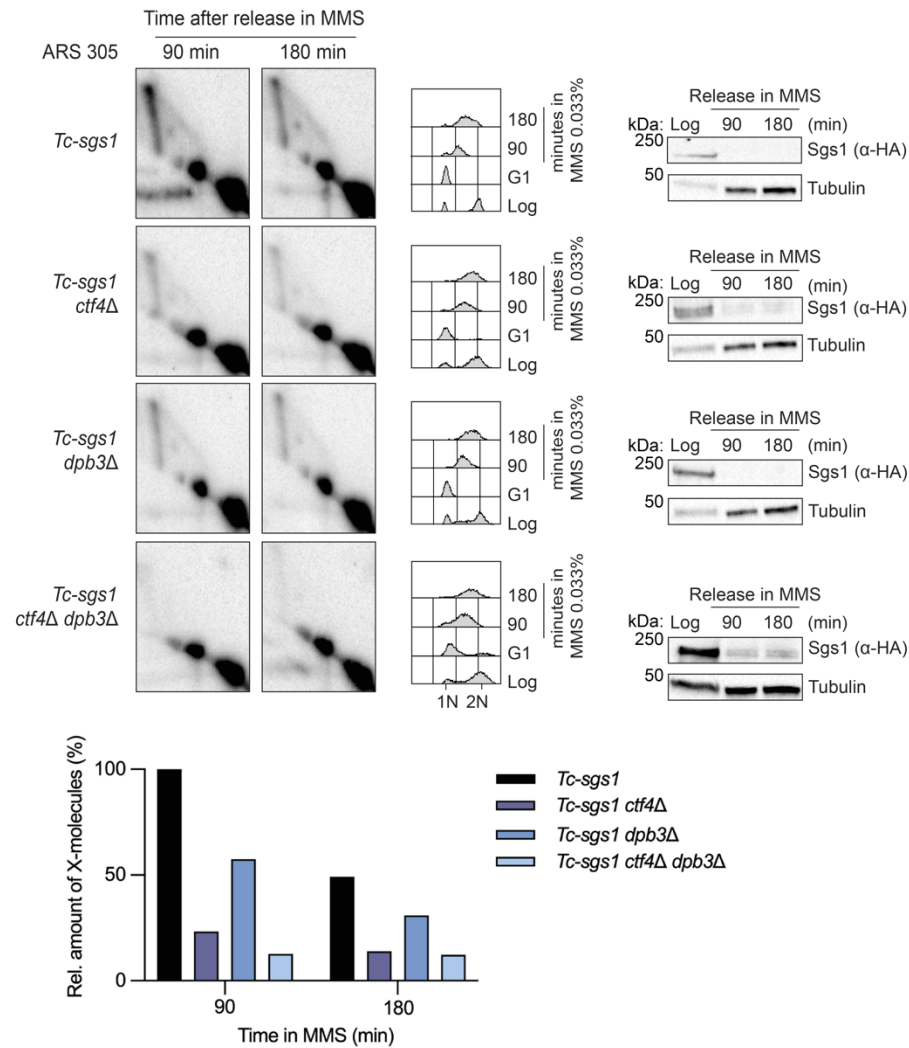

**Figure S2. Error-free DNA damage tolerance via template switching is mediated by Ctf4 and Dpb3**

2D gel analysis of DNA replication and recombination intermediates accumulating in the ARS305 region of the cells with the indicated genotypes. The strains with the indicated backgrounds were synchronized in G1 with alpha-factor at 25°C and released at 30°C in YPD supplemented with 0.033% MMS. Depletion of Sgs1 was achieved by adding Tetracycline 1 mM to YPD medium during G1 arrest and release. Cells were collected at the indicated time points, subjected to in vivo psoralen-mediated inter-strand DNA crosslinking and genomic DNA was extracted and digested with *EcoRV* and *HindIII* restriction enzymes for 2D gel

analysis of the DNA replication and recombination intermediates accumulating in the ARS305 region. Depletion of HA-Sgs1 was monitored by western blot, using tubulin as a loading control. Cell cycle progression was monitored by FACS analysis. 1N and 2N indicate G1 and G2/M cell cycle phases respectively. Quantification of the X-molecules signals is reported in the histogram. The intensity of the signals was normalized to the monomer spot and shown in the histograms relative to the highest signal assigned as 100%.

| Strain                                    | MMS-induced<br>mutation rate<br><i>CAN1</i> ( $\times 10^{-6}$ ) |
|-------------------------------------------|------------------------------------------------------------------|
| WT                                        | 1.6<br>[-0.4/+0.4]                                               |
| <i>ctf4</i> $\Delta$                      | 5.1<br>[-1.6/+1.6]                                               |
| <i>dpb3</i> $\Delta$                      | 3.3<br>[-1.0/+1.0]                                               |
| <i>ctf4</i> $\Delta$ <i>dpb3</i> $\Delta$ | 16.7<br>[-4.8/+4.7]                                              |

### Figure S3. Ctf4 and Dpb3 synergistically suppress mutagenesis

MMS-induced mutation rates at *CAN1* locus ( $\times 10^{-6}$ ) in cells with the indicated genotypes. Cells were treated with MMS 0.005% for 4 hours before proceeding with the mutagenesis assay. Mutation rates with 95% confidence intervals were calculated using the generating function (GF) estimator software bz-rates.

**A**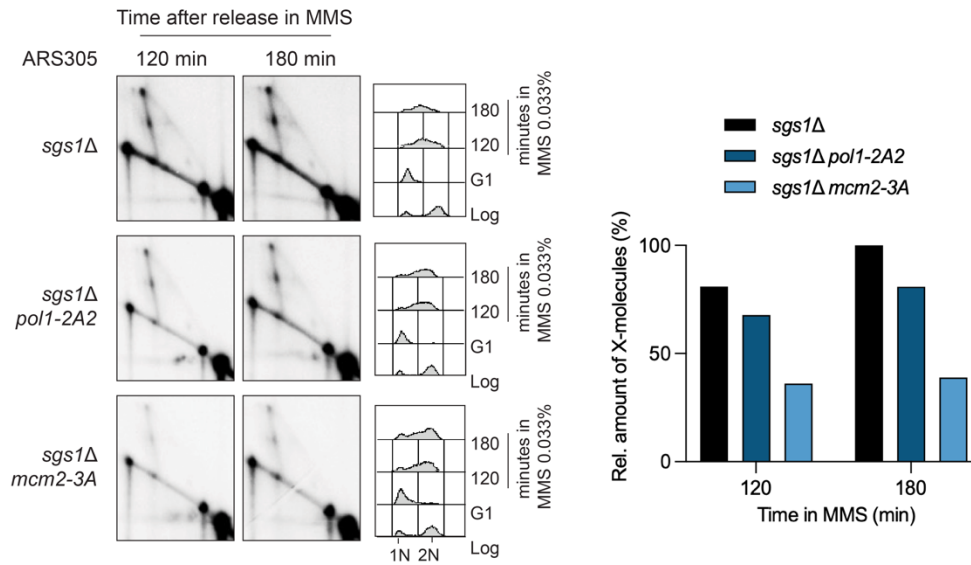**B**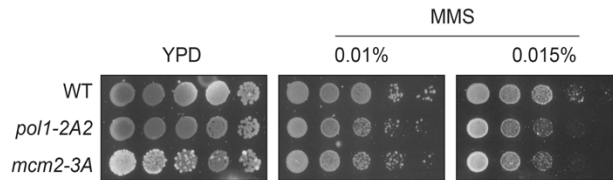**C**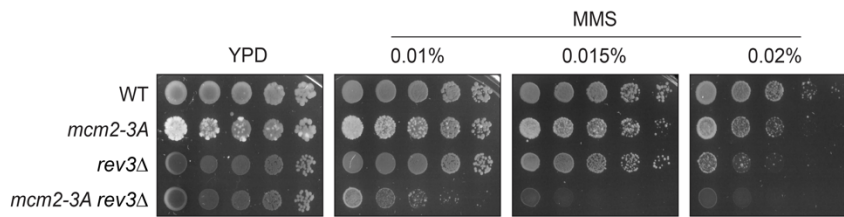**D**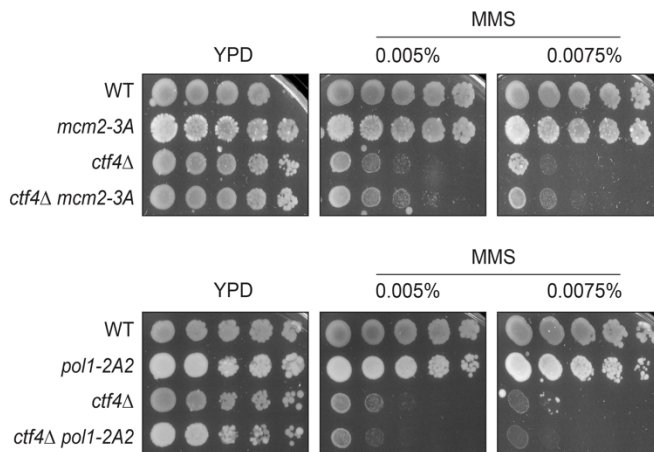

**Figure S4. Replication-coupled recombination relies on Mcm2-Ctf4-Pol $\alpha$  axis of parental nucleosome deposition that synergizes with loss of DNA polymerase zeta**

**(A)** 2D gel analysis of DNA replication and recombination intermediates extracted from cells with the indicated genotypes. The strains with the indicated genetic backgrounds were synchronized in G1 with alpha-factor at 25°C and released at 30°C in YPD supplemented with 0.033% MMS. Cells were collected at the indicated time point, subjected to in vivo psoralen-mediated DNA inter-strand crosslinking and genomic DNA was extracted and was digested with *NcoI* restriction enzyme for 2D gel analysis of the DNA replication intermediates accumulating in the ARS305 region. Cell cycle progression was monitored by FACS analysis. 1N and 2N indicate G1 and G2/M cell cycle phases respectively. Quantification of the X-molecules signals is reported in the histogram. The intensity of the signals was normalized to the monomer spot and shown in the histograms relative to the highest signal assigned as 100%.

**(B, C)** Synergistic effect of *REV3* deletion on the MMS sensitivity of *pol1-2A2* and *mcm2-3A* mutant cells. The cells with the indicated genotypes were grown overnight in liquid medium and serial dilutions of cells were spotted on YPD plates with and without the indicated concentrations of MMS. After 3 days of incubation at 28°C, the plates were photographed. Similar results were obtained in two independent experiments.

**(D)** *mcm2-3A* and *pol1-2A2* effect on *ctf4Δ* cells MMS sensitivity. Cells of the indicated genotypes were grown overnight at 28°C, serially diluted and spotted on YPD plates containing MMS at the indicated concentrations. Cells were allowed to grow for three days at 28°C before images were taken. Three independent experiments were performed showing similar results.
